# Supplementary material
Source: PubMed Central journal article supplement (PMC3130349)
Supplement: NIHMS303400-supplement-Supplementary_Information.pdf [file NIHMS303400-supplement-Supplementary_Information.pdf]

## Supplementary Figure 1

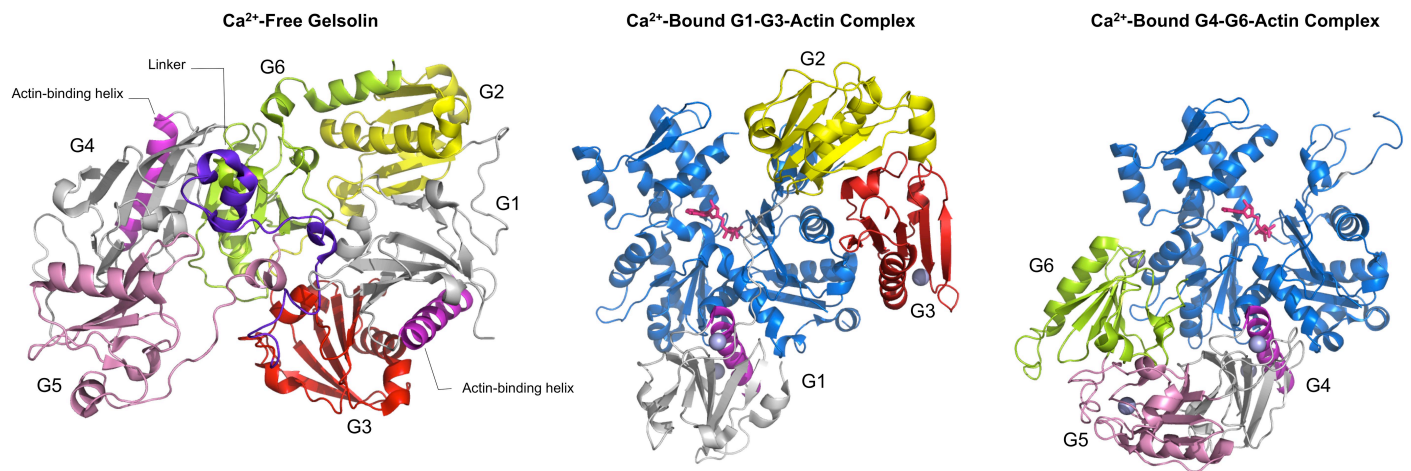

**Supplementary Figure 1.** Structures of gelsolin and gelsolin-actin complexes. The left diagram shows the structure of full-length Ca<sup>2+</sup>-free gelsolin (PDB code 1D0N). Gelsolin consists of six homologous subdomains named G1 to G6. The structure shows the inactive, Ca<sup>2+</sup>-free state of gelsolin, in which it adopts a compact conformation stabilized by intra-molecular interactions of its various domains. In this conformation, the actin-binding sites are masked. The diagrams in the middle and the right show complexes of actin with Ca<sup>2+</sup>-bound gelsolin fragments G1-G3 (PDB code 1RGI) and G4-G6 (PDB code 1H1V), respectively. Domains G1 and G4 contain the two major actin binding sites. These domains bind similarly to actin, inserting a helix in the target-binding cleft of actin.

## Supplementary Figure 2

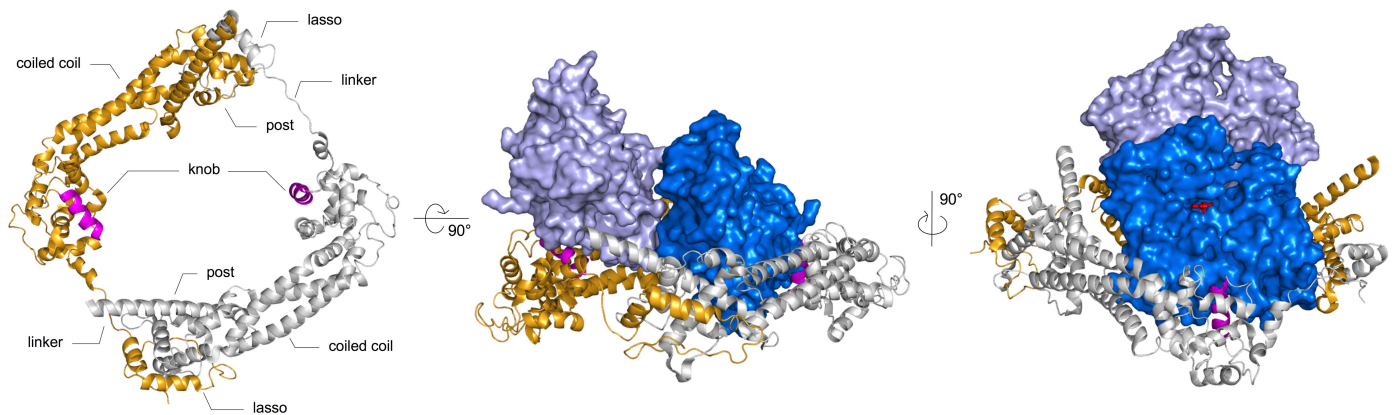

**Supplementary Figure 2.** Structure of the formin FH2 domain in complex with actin (PDB code 1Y64) (38). From left to right, the figure shows the crystallographic (related by a two-fold screw dyad axis) FH2 dimer, obtained after domain swapping the 'lasso' region from the lower subunit, and two orientations of the crystallographic FH2-actin dimer (actin subunits shown in blue and gray). Each FH2 domain is structurally subdivided into lasso, linker, knob, coiled coil, and post regions. A helix from the FH2 knob region inserts into the target-binding cleft of actin (magenta).

### Supplementary Figure 3

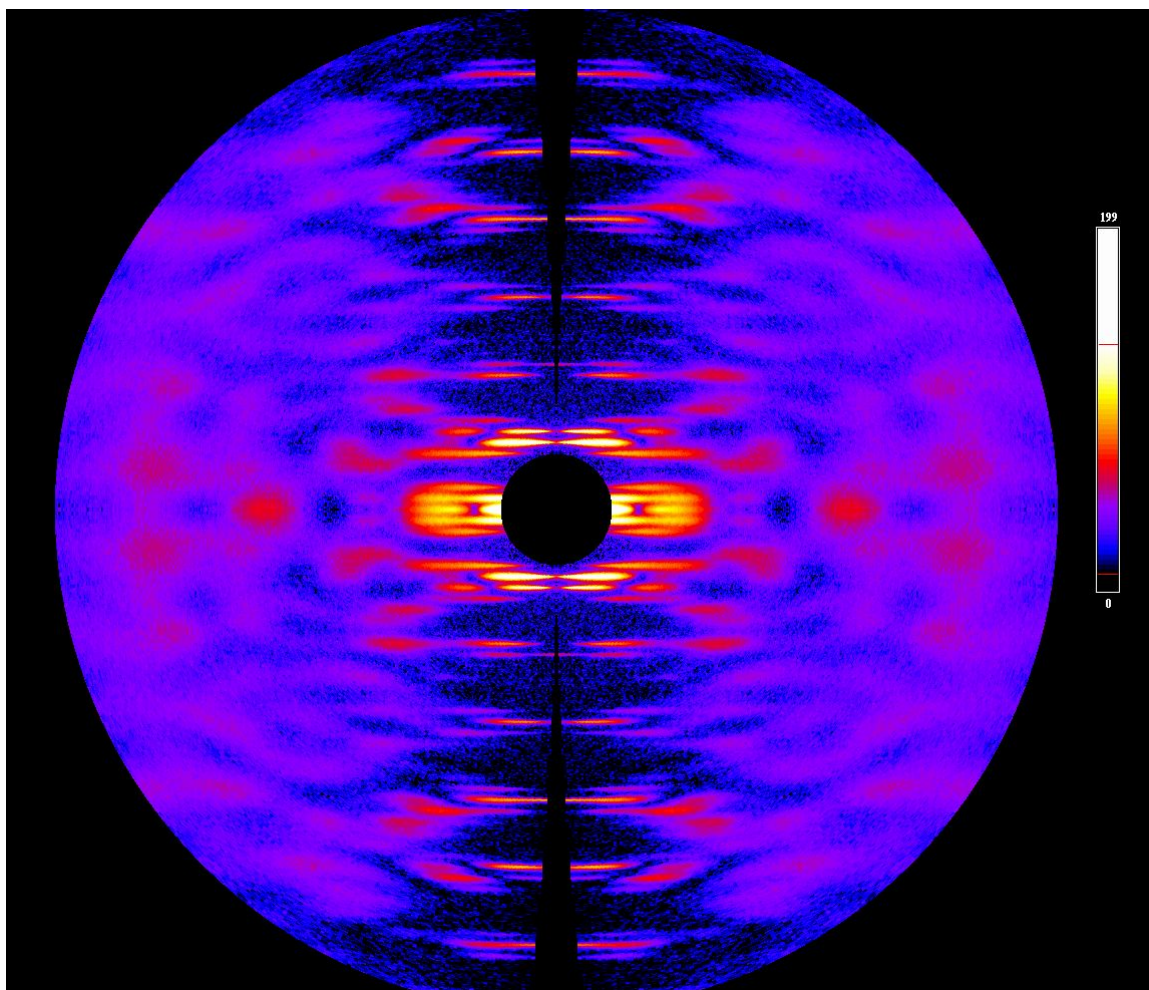

**Supplementary Figure 3.** An X-ray fiber diffraction pattern (false colors: blue low, red middle, white high intensity) from an orientated gel of F-actin, where the orientation has been improved by immersing it in an 18 Tesla magnetic field (ref 35 in main and 41 below). Note the very well orientated-layer lines.

TABLE 1

Structures of Actin and Arps listed in order of deposition and by species (August 31, 2010)

| Entry                                     | Res. (Å) | Description                                                       | Reference |
|-------------------------------------------|----------|-------------------------------------------------------------------|-----------|
| <b><math>\alpha</math>-skeletal actin</b> |          |                                                                   |           |
| 1ATN                                      | 2.80     | Complex with DNase I                                              | (21)      |
| 1EQY                                      | 2.30     | Complex with Gelsolin G1                                          | (32)      |
| 1ESV                                      | 2.00     | Complex with Gelsolin G1 and Latrunculin A                        | (33)      |
| 1H1V                                      | 3.00     | Complex with Gelsolin G4-G6                                       | (10)      |
| 1IJJ                                      | 2.85     | Complex with Polylysine and Latrunculin A                         | (6)       |
| 1J6Z                                      | 1.54     | Uncomplexed TMR-actin in ADP state                                | (43)      |
| 1KXP                                      | 2.10     | Complex with vitamin D-binding protein (DBP)                      | (44)      |
| 1LCU                                      | 3.50     | Complex with Polylysine and Latrunculin A                         | (6)       |
| 1LOT                                      | 2.50     | Complex with Vitamin D-Binding Protein (DBP)                      | (16)      |
| 1MA9                                      | 2.40     | Complex with Vitamin D-Binding Protein (DBP)                      | (54)      |
| 1NWK                                      | 1.85     | Uncomplexed TMR-actin with bound AMPPNP                           | (14)      |
| 1P8Z                                      | 2.60     | Complex with Gelsolin G1 and G1-G2 linker                         | (19)      |
| 1QZ5                                      | 1.45     | Complex with marine macrolide Kabiramide C                        | (22)      |
| 1QZ6                                      | 1.60     | Complex with marine macrolide Jaspisamide A                       | (22)      |
| 1RDW                                      | 2.30     | Complex with Latrunculin A                                        | (47)      |
| 1RFQ                                      | 3.00     | Complex with Latrunculin A                                        | (47)      |
| 1RGI                                      | 3.00     | Complex with Gelsolin G1-G3                                       | (7)       |
| 1S22                                      | 1.60     | Complex with marine macrolide Ulapualide A                        | (2)       |
| 1SQK                                      | 2.50     | Complex with Ciboulot and Latrunculin A                           | (17)      |
| 1T44                                      | 2.00     | Complex with hybrid protein Gelsolin(28-152)-T $\beta$ 4(153-171) | (20)      |
| 1WUA                                      | 1.45     | Complex with marine macrolide Aplyronine A                        | (18)      |
| 1Y64                                      | 3.05     | Complex with Formin Homology 2 (FH2) domain                       | (42)      |
| 1YXQ                                      | 2.01     | Complex with marine macrolide Swinholide A                        | (23)      |
| 2A3Z                                      | 2.08     | Complex with DNase I and WH2 domain of WASP                       | (8)       |
| 2A40                                      | 1.80     | Complex with DNase I and WH2 domain of WAVE                       | (8)       |
| 2A41                                      | 2.60     | Complex with DNase I and WH2 domain of WIP                        | (8)       |
| 2A42                                      | 1.85     | Complex with DNase I                                              | (8)       |
| 2A5X                                      | 2.49     | Longitudinally cross-linked actin dimer                           | (25)      |
| 2ASM                                      | 1.60     | Complex with marine macrolide Reidispongiolide A                  | (3)       |
| 2ASO                                      | 1.70     | Complex with marine macrolide Sphinxolide B                       | (3)       |
| 2ASP                                      | 1.64     | Complex with marine macrolide Reidispongiolide A                  | (3)       |
| 2D1K                                      | 2.50     | Complex with DNase I and WH2 domain of MIM                        | (29)      |
| 2FF3                                      | 2.00     | Complex with hybrid protein Gelsolin-WASP                         | (1)       |
| 2FF6                                      | 2.05     | Complex with hybrid protein Gelsolin-Ciboulot                     | (1)       |
| 2FXU                                      | 1.35     | Complex with marine macrolide Bistramide A                        | (48)      |
| 2GWJ                                      | 1.90     | ADP-ribosylated at Arg177 by Salmonella SpvB protein              | (30)      |
| 2GWK                                      | 2.00     | ADP-ribosylated at Arg177 by Salmonella SpvB protein              | (30)      |
| 2HMP                                      | 1.90     | Cleaved between Gly42 and Val43 by ECP32 protease                 | (24)      |
| 2PAV                                      | 1.80     | Complex with Profilin and last Pro-rich motif of VASP             | (13)      |
| 2PBD                                      | 1.50     | Complex with Profilin and Pro-rich-GAB domains of VASP            | (13)      |
| 2Q0R                                      | 1.70     | Complex with marine macrolide Pectenotoxin-2                      | (4)       |
| 2Q0U                                      | 1.45     | Complex with marine macrolide Pectenotoxin-2 and LatB             | (4)       |
| 2Q1N                                      | 2.70     | Longitudinally cross-linked actin dimer                           | (51)      |
| 2Q31                                      | 2.70     | Longitudinally cross-linked actin dimer                           | (51)      |
| 2Q36                                      | 2.50     | Laterally cross-linked actin dimer complexed with Kabiramide C    | (51)      |
| 2Q97                                      | 2.50     | Complex with Toxofilin from <i>Toxoplasma gondii</i>              | (28)      |
| 2V51                                      | 2.35     | Complex with RPEL-1 from serum response factor coactivator MAL    | (34)      |



|                                                   |      |                                                                           |      |
|---------------------------------------------------|------|---------------------------------------------------------------------------|------|
| 2V52                                              | 1.45 | Complex with RPEL-2 from serum response factor coactivator MAL            | (34) |
| 2VCP                                              | 3.20 | Complex with N-WASP WH2 Domain                                            | TBP  |
| 2VYP                                              | 2.35 | Complex with macrolide rhizopodin from Myxobacteria                       | (15) |
| 3BUZ                                              | 2.81 | Complex with <i>Clostridium perfringens</i> ADP-ribosylating iota-toxin   | (53) |
| 3CJB                                              | 3.21 | Glu270-Lys50 RTX toxin cross-linked complex with Gelsolin G1              | (26) |
| 3CJC                                              | 3.90 | RTX toxin cross-linked complex with Gelsolin G1 and DNase I               | (26) |
| 3DAW                                              | 2.55 | Complex with Twinfilin(167-322) C-terminal ADF-homology domain            | (45) |
| 3FFK                                              | 3.00 | Complex with Ca <sup>2+</sup> -bound Gelsolin G1-G3                       | (35) |
| 3HBT                                              | 2.70 | Monomeric actin crystallized alone in the presence of Hsp27               | (56) |
| 3MN5                                              | 1.50 | Complex with WH2 domain of Spire                                          | (12) |
| 3M1F                                              | 2.89 | Complex with cross-linked WH2 domain from VopL                            | (46) |
| 3M3N                                              | 7.00 | Longitudinal Actin Dimer Assembled by Tandem W Domains                    | (46) |
| 1MDU                                              | 2.20 | Cross-linked trimer of chicken $\alpha$ -skeletal actin complexed with G1 | (11) |
| <b><math>\beta</math>-actin</b>                   |      |                                                                           |      |
| 2BTF                                              | 2.55 | Complex with Profilin (original structure)                                | (52) |
| 1HLU                                              | 2.65 | Complex with Profilin (open state obtained by crystal manipulation)       | (9)  |
| 2OAN                                              | 2.61 | Oxidized, Cys374-Cys374 cross-linked, antiparallel dimer                  | (27) |
| <b><i>Dictyostelium</i> actin</b>                 |      |                                                                           |      |
| 1C0F                                              | 2.40 | Complex with Gelsolin G1                                                  | (31) |
| 1C0G                                              | 2.00 | <i>Dictyostelium</i> actin mutant in complex with Gelsolin G1             | (31) |
| 1DEJ                                              | 2.40 | <i>Dictyostelium</i> actin mutant in complex with Gelsolin G1             | (31) |
| 1NLV                                              | 1.80 | Complex with Gelsolin G1 (Ca <sup>2+</sup> -ATP)                          | (55) |
| 1NM1                                              | 1.80 | Complex with Gelsolin G1 (Mg <sup>2+</sup> -ATP)                          | (55) |
| 1NMD                                              | 1.90 | Complex with Gelsolin G1 (Lithium ATP)                                    | (55) |
| 3CHW                                              | 2.30 | Complex with Profilin and Last Pro-rich motif of VASP                     | (5)  |
| 3CI5                                              | 1.70 | Tyr53 phosphorylated in complex with Gelsolin G1                          | (5)  |
| 3CIP                                              | 1.60 | Complex with Gelsolin G1                                                  | (5)  |
| <b>Yeast actin</b>                                |      |                                                                           |      |
| 1YAG                                              | 1.90 | Complex with Gelsolin G1                                                  | (55) |
| 1YVN                                              | 2.10 | Val159Asn mutant complexed with Gelsolin G1                               | TBP  |
| <b><i>Drosophila melanogaster</i> (Fruit fly)</b> |      |                                                                           |      |
| 2HF3                                              | 1.80 | Subdomain 4 double-mutant (Ala204Glu Pro243Lys) in ADP state              | (50) |
| 2HF4                                              | 1.80 | Subdomain 4 double-mutant (Ala204Glu Pro243Lys) in ATP state              | (50) |
| 3EKS                                              | 1.80 | Ala204Glu, Pro243Lys mutant complex cytochalasin D                        | (36) |
| 3EKU                                              | 2.50 | Ala204Glu, Pro243Lys mutant with cytochalasin D (soaked)                  | (36) |
| 3EL2                                              | 2.50 | Ala204Glu, Pro243Lys mutant with cytochalasin D                           | (36) |
| 3MMV                                              | 2.80 | Ala204Glu, Pro243Lys mutant complex with WH2 domain of Spire              | (12) |
| 3MN6                                              | 2.00 | Ala204Glu, Pro243Lys mutant complex with WH2 domain of Spire              | (12) |
| 3MN7                                              | 2.00 | Ala204Glu, Pro243Lys mutant complex with WH2 domain of Spire              | (12) |
| 3MN9                                              | 2.00 | Ala204Glu, Pro243Lys mutant complex with WH2 domain of Spire              | (12) |
| <b><i>Caenorhabditis elegans</i> actin</b>        |      |                                                                           |      |
| 1D4X                                              | 1.75 | Complex with Gelsolin G1                                                  | (55) |
| <b>Arps</b>                                       |      |                                                                           |      |
| 1K8K                                              | 2.00 | Arp2/3 complex (nucleotide free Arps)                                     | (49) |
| 1TYQ                                              | 2.55 | Arp2/3 complex (Ca <sup>2+</sup> -ATP Arps)                               | (37) |
| 1U2V                                              | 2.55 | Arp2/3 complex (Ca <sup>2+</sup> -ADP Arps)                               | (37) |
| 2P9I                                              | 2.46 | Arp2/3 complex (Ca <sup>2+</sup> -ADP Arps, gluteraldehyde crosslinked)   | (38) |
| 2P9K                                              | 2.59 | Arp2/3 complex (Ca <sup>2+</sup> -ATP Arps, gluteraldehyde crosslinked)   | (38) |
| 2P9L                                              | 2.65 | Arp2/3 complex (nucleotide free Arps)                                     | (38) |
| 2P9N                                              | 2.85 | Arp2/3 complex (Ca <sup>2+</sup> -ADP Arps)                               | (38) |

|      |      |                                               |      |
|------|------|-----------------------------------------------|------|
| 2P9P | 2.90 | Arp2/3 complex (Ca <sup>2+</sup> -ADP Arps)   | (38) |
| 2P9S | 2.68 | Arp2/3 complex (Mg <sup>2+</sup> -ATP Arps)   | (38) |
| 2P9U | 2.75 | Arp2/3 complex (Mg <sup>2+</sup> -ANP Arps)   | (38) |
| 3DXK | 2.70 | Arp2/3 Complex with bound inhibitor CK0944636 | (40) |
| 3DXM | 2.85 | Arp2/3 Complex with bound inhibitor CK0993548 | (40) |
| 3DWL | 3.78 | Yeast Arp2/3 complex lacking subunit Arp2     | (39) |

TBP – To be published

Different background colors indicate complexes with different protein domains or macrolides. A white background indicates structures that do not fall into any of these categories.

DNase I

Gelsolin

Profilin

Iota toxin

WH2/Tβ4 domain

RPEL-1 domain

ADF-homology domain

Vitamin D-binding protein (DBP)

Toxofilin

Formin Homology 2 (FH2) domain

Marine macrolides

## LITERATURE CITED

1. Aguda AH, Xue B, Irobi E, Preat T, Robinson RC. 2006. The structural basis of actin interaction with multiple WH2/beta-thymosin motif-containing proteins. *Structure* 14:469-76
2. Allingham JS, Tanaka J, Marriott G, Rayment I. 2004. Absolute stereochemistry of ulapualide A. *Organic letters* 6:597-9
3. Allingham JS, Zampella A, D'Auria MV, Rayment I. 2005. Structures of microfilament destabilizing toxins bound to actin provide insight into toxin design and activity. *Proc Natl Acad Sci U S A* 102:14527-32
4. Allingham JS, Miles CO, Rayment I. 2007. A structural basis for regulation of actin polymerization by pectenotoxins. *J Mol Biol* 371:959-70
5. Baek K, Liu X, Ferron F, Shu S, Korn ED, Dominguez R. 2008. Modulation of actin structure and function by phosphorylation of Tyr-53 and profilin binding. *Proc Natl Acad Sci U S A* 105:11748-53
6. Bubb MR, Govindasamy L, Yarmola EG, Vorobiev SM, Almo SC, et al. 2002. Polylysine induces an antiparallel actin dimer that nucleates filament assembly: crystal structure at 3.5-Å resolution. *J Biol Chem* 277:20999-1006
7. Burtnick LD, Urosev D, Irobi E, Narayan K, Robinson RC. 2004. Structure of the N-terminal half of gelsolin bound to actin: roles in severing, apoptosis and FAF. *EMBO J* 23:2713-22
8. Chereau D, Kerff F, Graceffa P, Grabarek Z, Langsetmo K, Dominguez R. 2005. Actin-bound structures of Wiskott-Aldrich syndrome protein (WASP)-homology domain 2 and the implications for filament assembly. *Proc Natl Acad Sci U S A* 102:16644-9

9. Chik JK, Lindberg U, Schutt CE. 1996. The structure of an open state of beta-actin at 2.65 Å resolution. *J Mol Biol* 263:607-23.
10. Choe H, Burtnick LD, Mejillano M, Yin HL, Robinson RC, Choe S. 2002. The calcium activation of gelsolin: insights from the 3Å structure of the G4-G6/actin complex. *J Mol Biol* 324:691-702
11. Dawson JF, Sablin EP, Spudich JA, Fletterick RJ. 2003. Structure of an F-actin trimer disrupted by gelsolin and implications for the mechanism of severing. *J Biol Chem* 278:1229-38
12. Ducka AM, Joel P, Popowicz GM, Trybus KM, Schleicher M, et al. Structures of actin-bound Wiskott-Aldrich syndrome protein homology 2 (WH2) domains of Spire and the implication for filament nucleation. *Proc Natl Acad Sci U S A* 107:11757-62
13. Ferron F, Rebowski G, Lee SH, Dominguez R. 2007. Structural basis for the recruitment of profilin-actin complexes during filament elongation by Ena/VASP. *EMBO J* 26:4597-606
14. Graceffa P, Dominguez R. 2003. Crystal Structure of Monomeric Actin in the ATP State: Structural Basis of Nucleotide-Dependent Actin Dynamics. *J Biol Chem* 278:34172-80
15. Hagelueken G, Albrecht SC, Steinmetz H, Jansen R, Heinz DW, et al. 2009. The absolute configuration of rhizopodin and its inhibition of actin polymerization by dimerization. *Angew Chem Int Ed Engl* 48:595-8
16. Head JF, Swamy N, Ray R. 2002. Crystal structure of the complex between actin and human vitamin D-binding protein at 2.5 Å resolution. *Biochemistry* 41:9015-20
17. Hertzog M, van Heijenoort C, Didry D, Gaudier M, Coutant J, et al. 2004. The beta-thymosin/WH2 domain; structural basis for the switch from inhibition to promotion of actin assembly. *Cell* 117:611-23
18. Hirata K, Muraoka S, Suenaga K, Kuroda T, Kato K, et al. 2006. Structure basis for antitumor effect of aplyronine a. *J Mol Biol* 356:945-54
19. Irobi E, Burtnick LD, Urosev D, Narayan K, Robinson RC. 2003. From the first to the second domain of gelsolin: a common path on the surface of actin? *FEBS Lett* 552:86-90
20. Irobi E, Aguda AH, Larsson M, Guerin C, Yin HL, et al. 2004. Structural basis of actin sequestration by thymosin-beta4: implications for WH2 proteins. *EMBO J* 23:3599-608
21. Kabsch W, Mannherz HG, Suck D, Pai EF, Holmes KC. 1990. Atomic structure of the actin:DNase I complex. *Nature* 347:37-44.
22. Klenchin VA, Allingham JS, King R, Tanaka J, Marriott G, Rayment I. 2003. Trisoxazole macrolide toxins mimic the binding of actin-capping proteins to actin. *Nat Struct Biol* 10:1058-63
23. Klenchin VA, King R, Tanaka J, Marriott G, Rayment I. 2005. Structural basis of swinholide A binding to actin. *Chem Biol* 12:287-91
24. Klenchin VA, Khaitlina SY, Rayment I. 2006. Crystal structure of polymerization-competent actin. *J Mol Biol* 362:140-50
25. Kudryashov DS, Sawaya MR, Adisetiyo H, Norcross T, Hegyi G, et al. 2005. The crystal structure of a cross-linked actin dimer suggests a detailed molecular interface in F-actin. *Proc Natl Acad Sci U S A* 102:13105-10
26. Kudryashov DS, Durer ZA, Ytterberg AJ, Sawaya MR, Pashkov I, et al. 2008. Connecting actin monomers by iso-peptide bond is a toxicity mechanism of the *Vibrio cholerae* MARTX toxin. *Proc Natl Acad Sci U S A* 105:18537-42
27. Lassing I, Schmitzberger F, Bjornstedt M, Holmgren A, Nordlund P, et al. 2007. Molecular and structural basis for redox regulation of beta-actin. *J Mol Biol* 370:331-48

28. Lee SH, Hayes DB, Rebowksi G, Tardieux I, Dominguez R. 2007. Toxofilin from *Toxoplasma gondii* forms a ternary complex with an antiparallel actin dimer. *Proc Natl Acad Sci U S A* 104:16122-7
29. Lee SH, Kerff F, Chereau D, Ferron F, Klug A, Dominguez R. 2007. Structural Basis for the Actin-Binding Function of Missing-in-Metastasis. *Structure* 15:145-55
30. Margarit SM, Davidson W, Frego L, Stebbins CE. 2006. A steric antagonism of actin polymerization by a salmonella virulence protein. *Structure* 14:1219-29
31. Matsuura Y, Stewart M, Kawamoto M, Kamiya N, Saeki K, et al. 2000. Structural basis for the higher Ca(2+)-activation of the regulated actin-activated myosin ATPase observed with Dictyostelium/Tetrahymena actin chimeras. *J Mol Biol* 296:579-95
32. McLaughlin PJ, Gooch JT, Mannherz HG, Weeds AG. 1993. Structure of gelsolin segment 1-actin complex and the mechanism of filament severing. *Nature* 364:685-92.
33. Morton WM, Ayscough KR, McLaughlin PJ. 2000. Latrunculin alters the actin-monomer subunit interface to prevent polymerization. *Nat Cell Biol* 2:376-8
34. Mouilleron S, Guettler S, Langer CA, Treisman R, McDonald NQ. 2008. Molecular basis for G-actin binding to RPEL motifs from the serum response factor coactivator MAL. *EMBO J* 27:3198-208
35. Nag S, Ma Q, Wang H, Chumnarnsilpa S, Lee WL, et al. 2009. Ca<sup>2+</sup> binding by domain 2 plays a critical role in the activation and stabilization of gelsolin. *Proc Natl Acad Sci U S A* 106:13713-8
36. Nair UB, Joel PB, Wan Q, Lowey S, Rould MA, Trybus KM. 2008. Crystal structures of monomeric actin bound to cytochalasin D. *J Mol Biol* 384:848-64
37. Nolen BJ, Littlefield RS, Pollard TD. 2004. Crystal structures of actin-related protein 2/3 complex with bound ATP or ADP. *Proc Natl Acad Sci U S A* 101:15627-32
38. Nolen BJ, Pollard TD. 2007. Insights into the influence of nucleotides on actin family proteins from seven structures of Arp2/3 complex. *Mol Cell* 26:449-57
39. Nolen BJ, Pollard TD. 2008. Structure and biochemical properties of fission yeast Arp2/3 complex lacking the Arp2 subunit. *J Biol Chem* 283:26490-8
40. Nolen BJ, Tomasevic N, Russell A, Pierce DW, Jia Z, et al. 2009. Characterization of two classes of small molecule inhibitors of Arp2/3 complex. *Nature* 460:1031-4
41. Oda T, Iwasa M, Aihara T, Maeda Y, Narita A. 2009. The nature of the globular- to fibrous-actin transition. *Nature* 457:441-5
42. Otomo T, Tomchick DR, Otomo C, Panchal SC, Machius M, Rosen MK. 2005. Structural basis of actin filament nucleation and processive capping by a formin homology 2 domain. *Nature* 433:488-94
43. Otterbein LR, Graceffa P, Dominguez R. 2001. The crystal structure of uncomplexed actin in the ADP state. *Science* 293:708-11
44. Otterbein LR, Cosio C, Graceffa P, Dominguez R. 2002. Crystal structures of the vitamin D-binding protein and its complex with actin: structural basis of the actin-scavenger system. *Proc Natl Acad Sci U S A* 99:8003-8.
45. Paavilainen VO, Oksanen E, Goldman A, Lappalainen P. 2008. Structure of the actin-depolymerizing factor homology domain in complex with actin. *J Cell Biol* 182:51-9
46. Rebowksi G, Namgoong S, Boczkowska M, Leavis PC, Navaza J, Dominguez R. 2010. Structure of a Longitudinal Actin Dimer Assembled by Tandem W Domains - Implications for Actin Filament Nucleation. *J Mol Biol*



47. Reutzell R, Yoshioka C, Govindasamy L, Yarmola EG, Agbandje-McKenna M, et al. 2004. Actin crystal dynamics: structural implications for F-actin nucleation, polymerization, and branching mediated by the anti-parallel dimer. *J Struct Biol* 146:291-301
48. Rizvi SA, Tereshko V, Kossiakoff AA, Kozmin SA. 2006. Structure of bistramide A-actin complex at a 1.35 angstroms resolution. *J Am Chem Soc* 128:3882-3
49. Robinson RC, Turbedsky K, Kaiser DA, Marchand JB, Higgs HN, et al. 2001. Crystal structure of Arp2/3 complex. *Science* 294:1679-84
50. Rould MA, Wan Q, Joel PB, Lowey S, Trybus KM. 2006. Crystal structures of expressed non-polymerizable monomeric actin in the ADP and ATP states. *J Biol Chem* 281:31909-19
51. Sawaya MR, Kudryashov DS, Pashkov I, Adisetiyo H, Reisler E, Yeates TO. 2008. Multiple crystal structures of actin dimers and their implications for interactions in the actin filament. *Acta Crystallogr D Biol Crystallogr* 64:454-65
52. Schutt CE, Myslik JC, Rozycki MD, Goonesekere NC, Lindberg U. 1993. The structure of crystalline profilin-beta-actin. *Nature* 365:810-6.
53. Tsuge H, Nagahama M, Oda M, Iwamoto S, Utsunomiya H, et al. 2008. Structural basis of actin recognition and arginine ADP-ribosylation by Clostridium perfringens iota-toxin. *Proc Natl Acad Sci U S A* 105:7399-404
54. Verboven C, Bogaerts I, Waelkens E, Rabijns A, Van Baelen H, et al. 2003. Actin-DBP: the perfect structural fit? *Acta Crystallogr D Biol Crystallogr* 59:263-73
55. Vorobiev S, Strokopytov B, Drubin DG, Frieden C, Ono S, et al. 2003. The structure of nonvertebrate actin: implications for the ATP hydrolytic mechanism. *Proc Natl Acad Sci U S A* 100:5760-5
56. Wang H, Robinson RC, Burtnick LD. The structure of native G-actin. *Cytoskeleton (Hoboken, N.J)* 67:456-65
